# Supplementary material for: Calibration-free quantitative analysis of thin-film oxide layers in semiconductors using laser induced breakdown spectroscopy (LIBS)
Source: Royal Society of Chemistry journal article supplement (doi:10.1039/c7ja00083a), 2017-01-01
Supplement: c7ja00083a1.pdf [file c7ja00083a1.pdf]

### Supplementary Information:

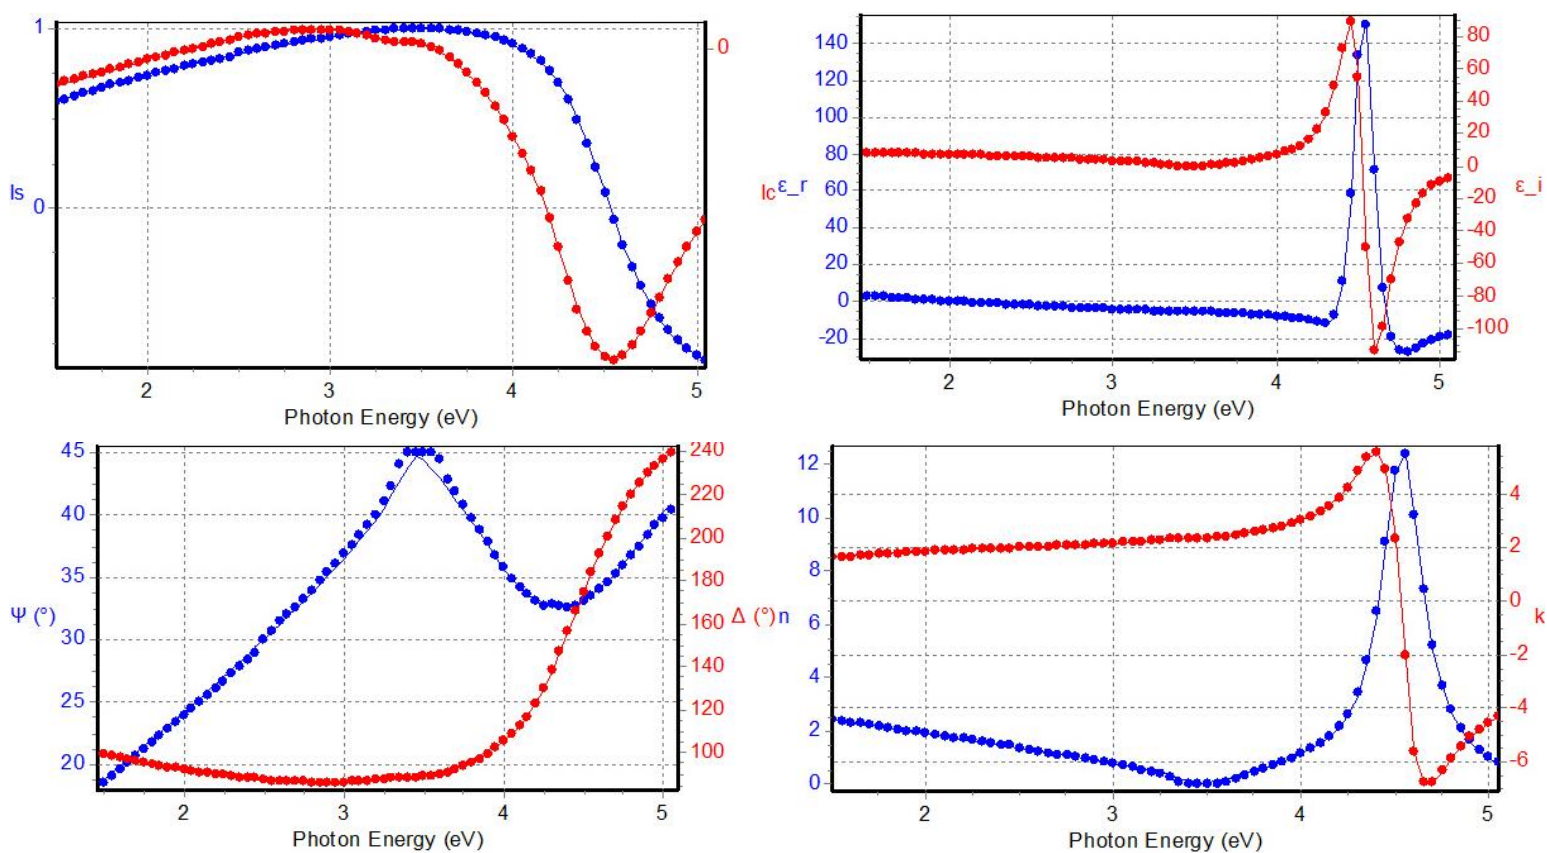

**Fig. S1.** Comparison between acquired ellipsometry data (data points) and the classical dispersion model fit (solid line) used for oxide layer thickness measurements (for case 900<sup>0</sup> C).
